# Supplementary figures and images for: Fonctionnalités, intégration et interfaces de la solution Microsoft Dynamics NAV
Source: Springer Nature journal article supplement (doi:10.1186/1471-2105-14-158), 2007-01-01

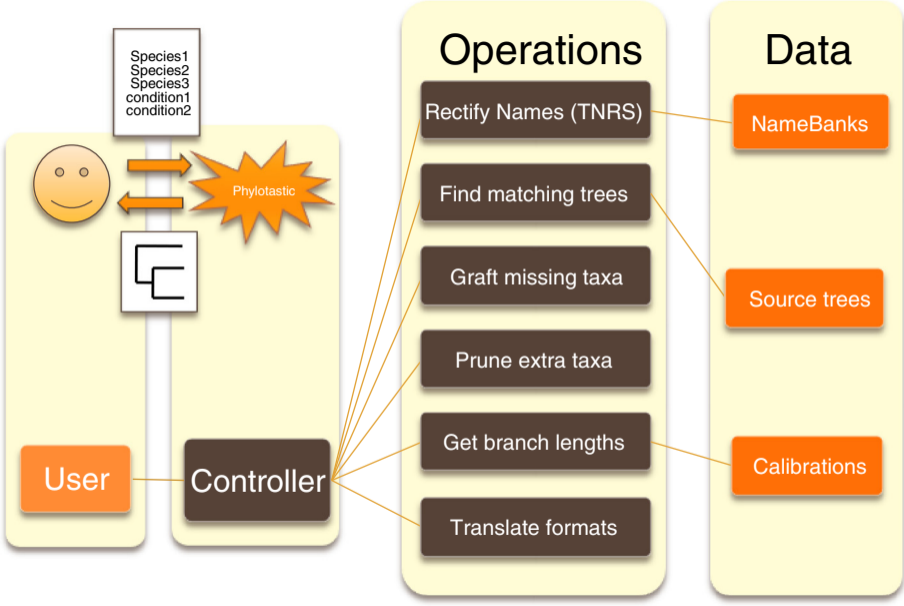

Supplement: 12859_2013_5897_MOESM1_ESM.pdf [file 12859_2013_5897_MOESM1_ESM.pdf]

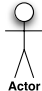

**TNRS**

**TREE STORE**

**TOPOLOGY**

**BRANCH LENGTH**

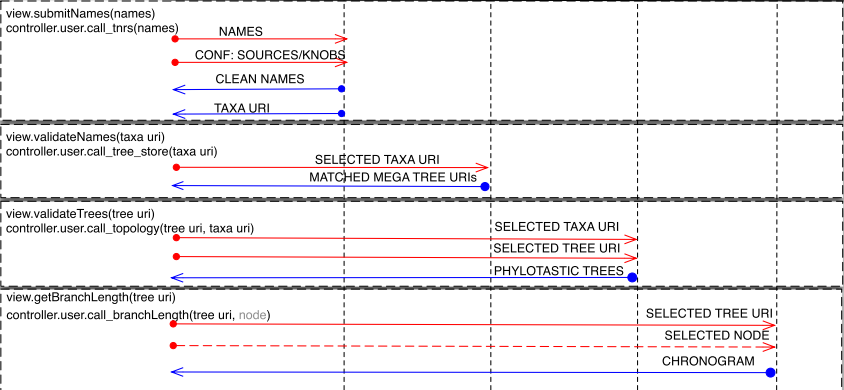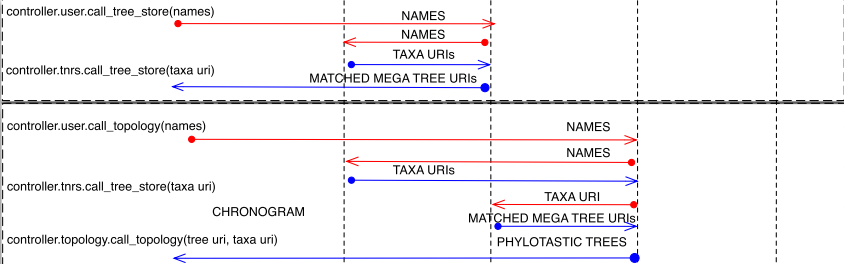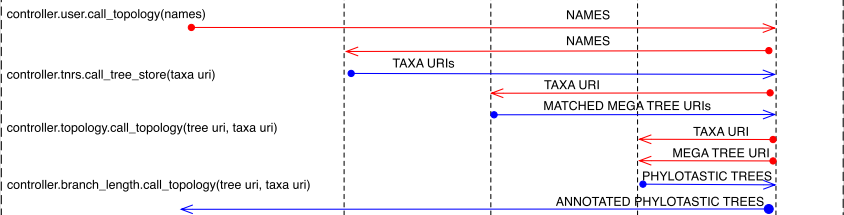

Supplement: 12859_2013_5897_MOESM2_ESM.pdf [file 12859_2013_5897_MOESM2_ESM.pdf]
